# Supplementary material for: On the Development of Phenol-Formaldehyde Resins Using a New Type of Lignin Extracted from Pine Wood with a Levulinic-Acid Based Solvent
Source: MDPI journal article supplement (doi:10.3390/molecules27092825), 2022-04-29
Supplement: s1 [file s1]

# On the development of phenol-formaldehyde resins using a new type of lignin extracted from pine wood with a levulinic-acid based solvent

Elodie Melro <sup>1,\*</sup>, Filipe E. Antunes <sup>1,2</sup>, Artur J. M. Valente <sup>1</sup>, Hugo Duarte <sup>3</sup>, Anabela Romano <sup>3</sup>, and Bruno Medronho <sup>3,4</sup>,

<sup>1</sup> University of Coimbra, CQC, Department of Chemistry, Rua Larga, 3004-535 Coimbra, Portugal; fcea@qui.uc.pt (F.E.A.); avalente@ci.uc.pt (A.J.M.V)

<sup>2</sup> Science351 – Disruptive & Sustainable R&D Innovations, Instituto Pedro Nunes, Ed C, 3030-199 Coimbra, Portugal; filipe.antunes@science351.pt (F.E.A.)

<sup>3</sup> MED-Mediterranean Institute for Agriculture, Environment and Development, Universidade do Algarve, Faculdade de Ciências e Tecnologia, Campus de Gambelas, Ed. 8, 8005-139 Faro, Portugal; hugo.mm.drt@gmail.com (H.D.); aromano@ualg.pt (A.R.); bfmedronho@ualg.pt (B.M.)

<sup>4</sup> FSCN, Surface and Colloid Engineering, Mid Sweden University, SE-851 70 Sundsvall, Sweden

\* Correspondence: elodie.melro@uc.pt

## Supplementary information

Without lignin

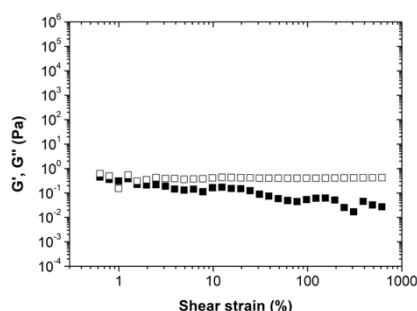

30 % Lignin

50 % Lignin

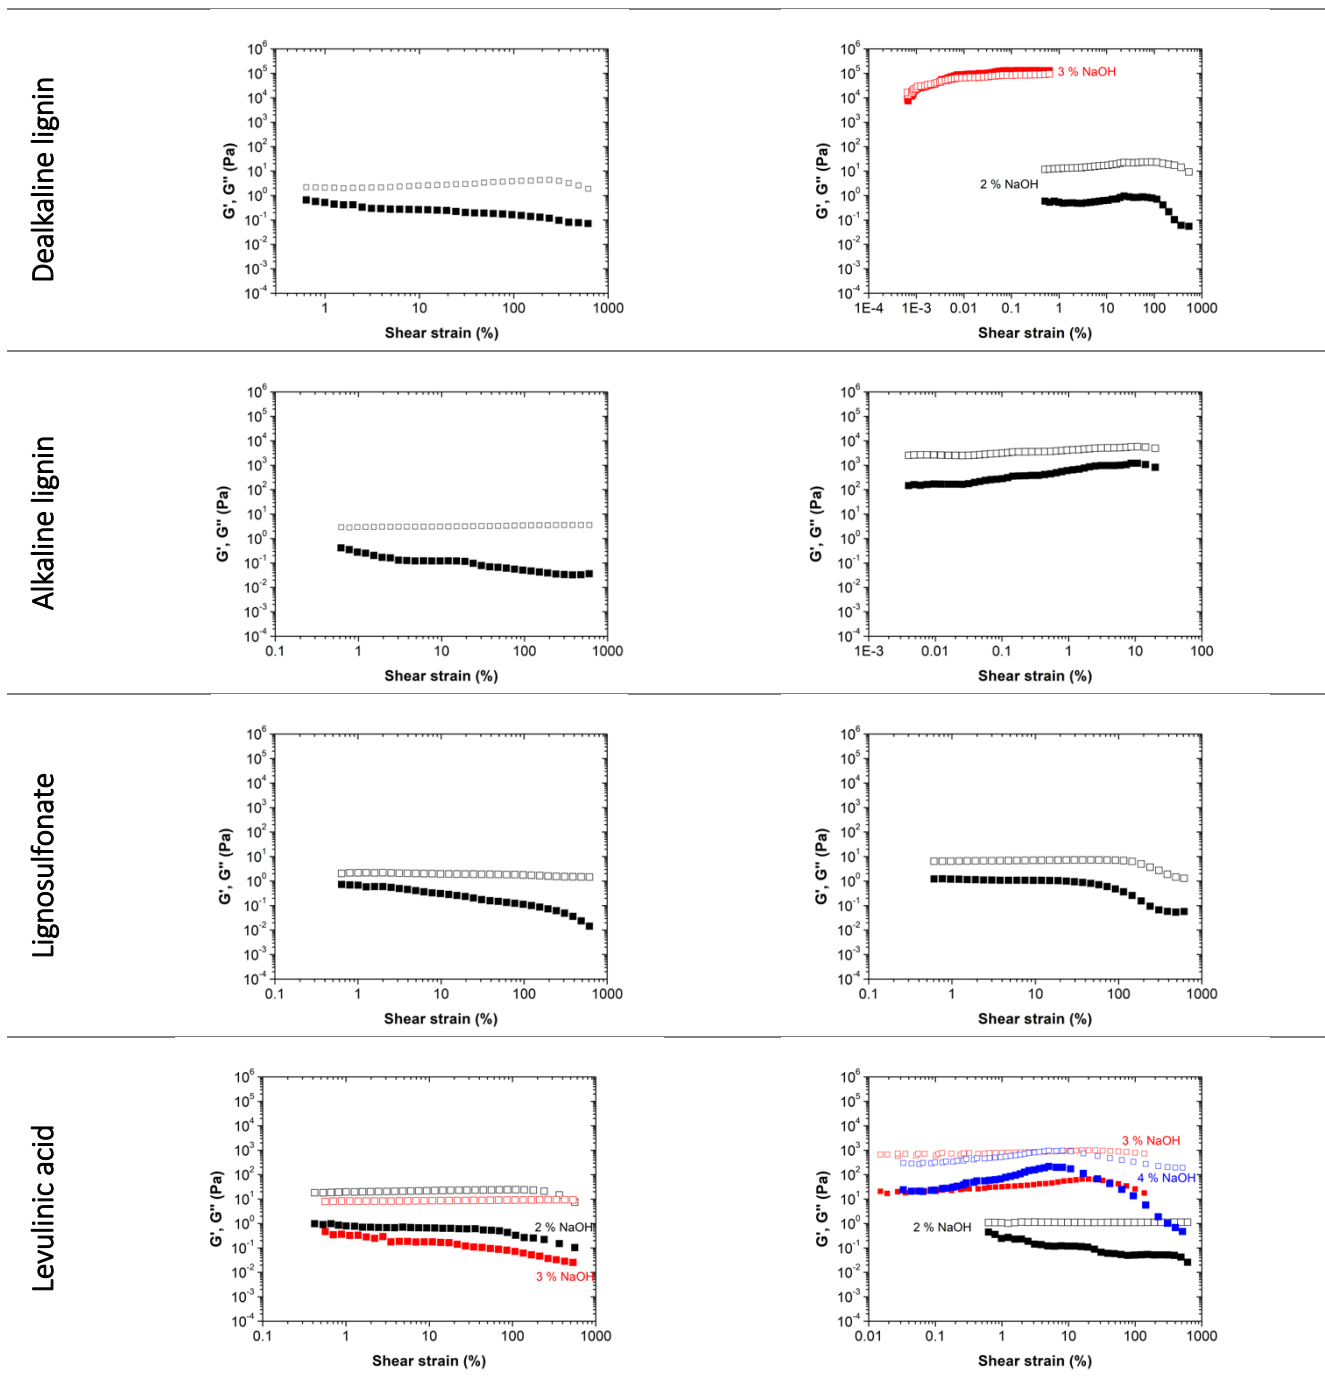

**Figure S1.** Strain amplitude sweep of resol resins, at 1 Hz and 20 °C.  $G'$  is representing by full squares, while  $G''$  by empty squares. The different colors indicate the different NaOH concentration: 2 % - black, 3 % - red, 4 % - blue.

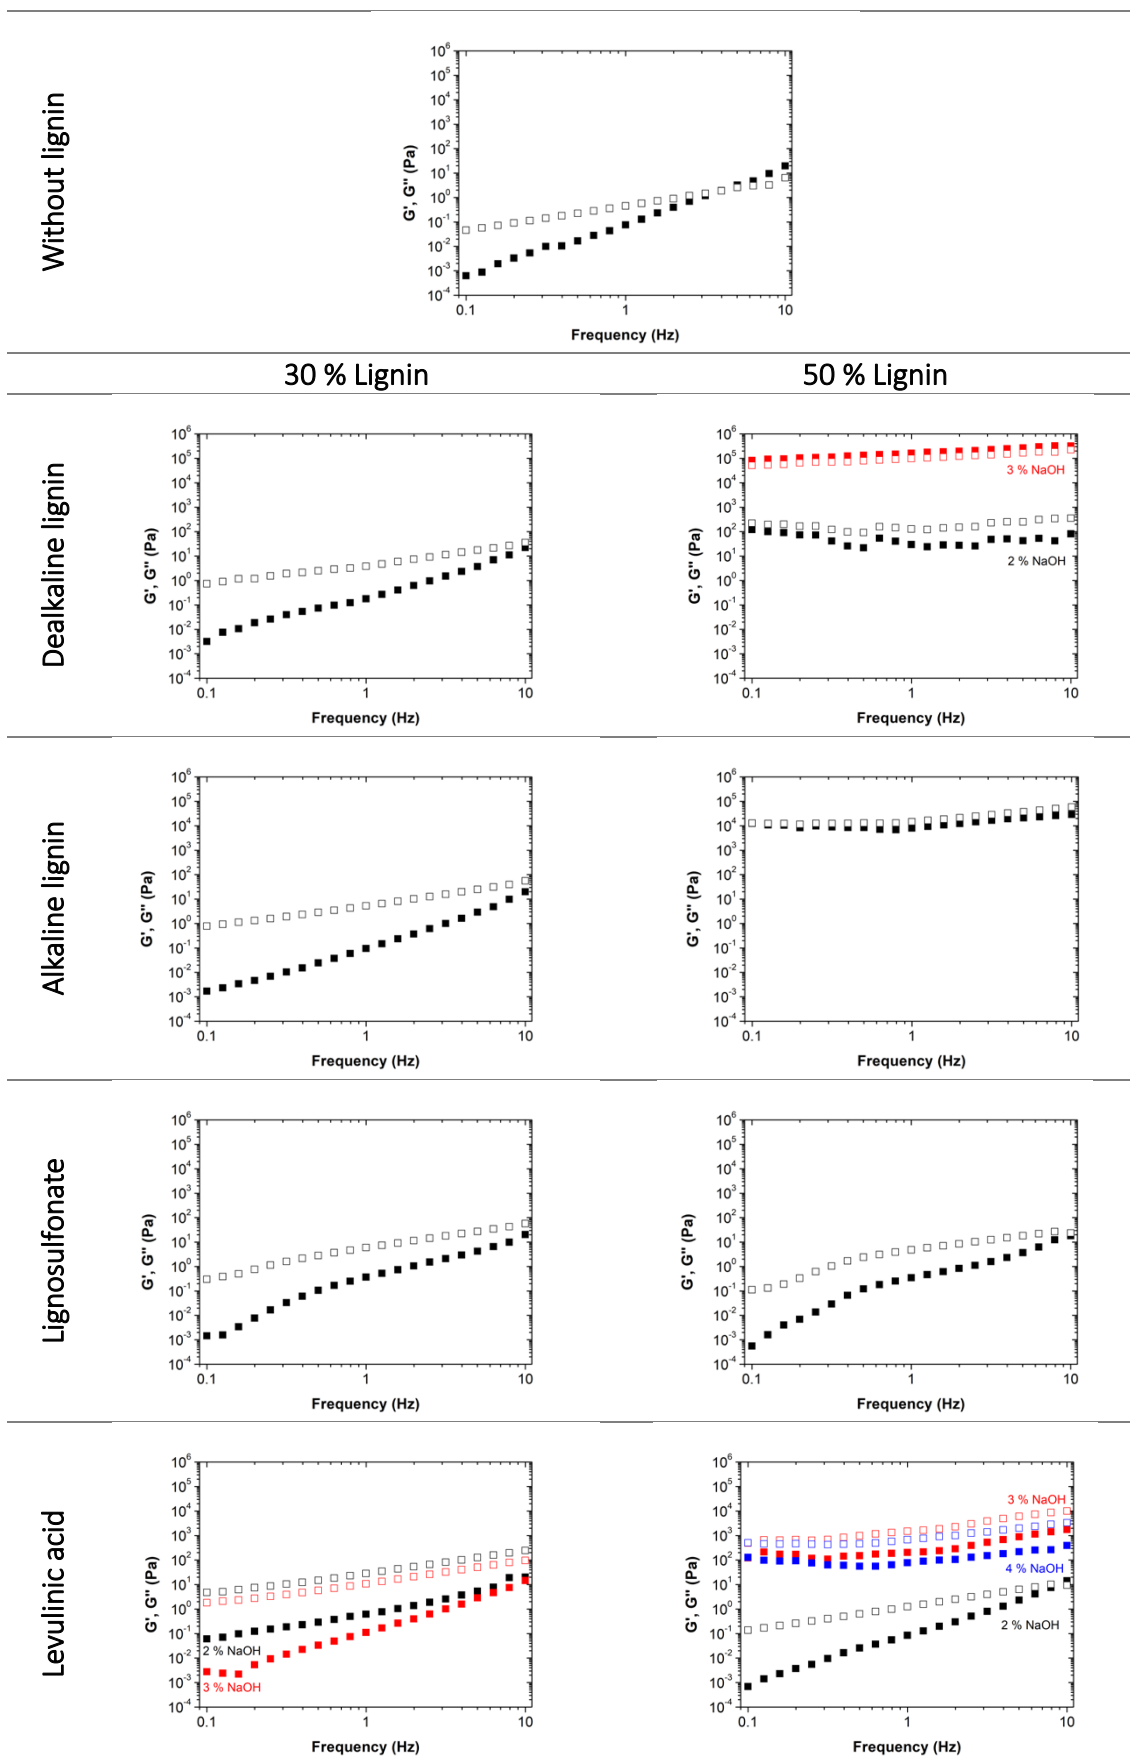

**Figure S2.** Frequency sweep of resol resins, at 5 Pa and 20 °C.  $G'$  is representing by full squares, while  $G''$  by empty squares. The different colors indicate the different NaOH concentration: 2 % - black, 3 % - red, 4 % - blue.

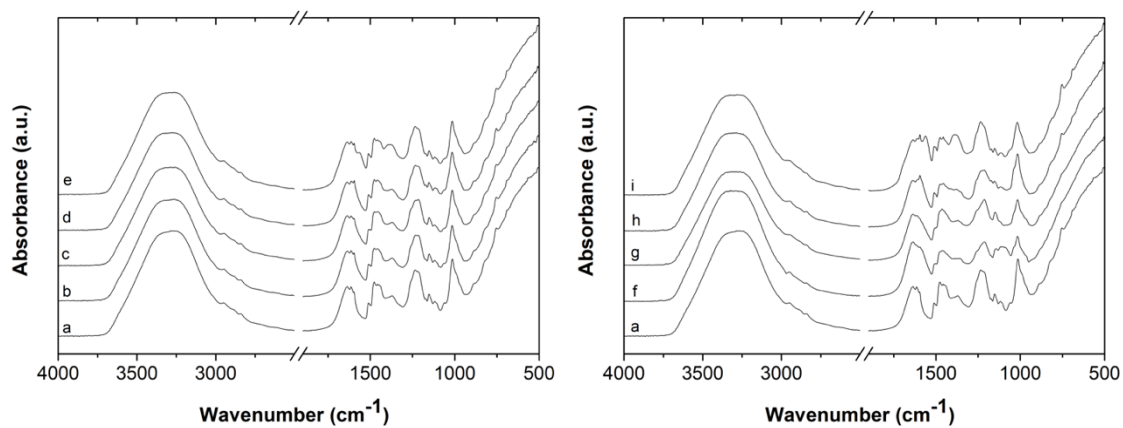

**Figure S3.** Normalized FTIR spectra of phenolic resins (a), 30 % (b-e) and 50 % (f-i) phenol replaced by lignin, using dealkaline lignin (b ,f), alkaline lignin (c, g), liginosulfonate (d, h) and lignin recovered from pine wood with levulinic acid (e, i), for optimized reins.
